# Supplementary material for: Novel Genes and Metabolite Trends in Bifidobacterium longum subsp. infantis Bi-26 Metabolism of Human Milk Oligosaccharide 2′-fucosyllactose
Source: PubMed Central journal article supplement (PMC6538704; doi:10.1038/s41598-019-43780-9), 2019-05-28
Supplement: 41598_2019_43780_MOESM1_ESM.pdf [file 41598_2019_43780_MOESM1_ESM.pdf]

## SUPPLEMENTAL MATERIAL

*Supplementary Figures 1-3 and Supplementary Tables 1-5 for manuscript:*

### **Novel Genes and Metabolite Trends in *Bifidobacterium longum* subsp. *infantis* Bi-26 Metabolism of Human Milk Oligosaccharide 2'-fucosyllactose**

Bryan Zabel<sup>1</sup>, Christian Clement Yde,<sup>2</sup> Paige Roos,<sup>3</sup> Jørn Marcussen,<sup>2</sup> Henrik Max Jensen,<sup>2</sup>  
Krista Salli<sup>4</sup>, Johanna Hirvonen<sup>4</sup>, Arthur C. Ouwehand<sup>4</sup>, Wesley Morovic<sup>1</sup>

<sup>1</sup>Genomics & Microbiome Science, DuPont Nutrition & Health, Madison, WI, USA

<sup>2</sup>Advanced Analysis, DuPont Nutrition Biosciences ApS, Brabrand, Aarhus, Denmark

<sup>3</sup>Genomics Lab, DuPont Pioneer, Johnston, IA, USA

<sup>4</sup>Global Health and Nutrition Science, DuPont Nutrition and Health, Kantvik, Finland

|                                                       | <i>B. longum</i> subsp. <i>Infantis</i><br>strain<br><b>Bi-26</b> | <i>B. longum</i> subsp. <i>Infantis</i><br>strain<br><b>ATCC15697</b> |
|-------------------------------------------------------|-------------------------------------------------------------------|-----------------------------------------------------------------------|
| <b>General genome feature</b>                         |                                                                   |                                                                       |
| Size                                                  | 2,569,657                                                         | 2,832,748                                                             |
| GC content                                            | 59.4%                                                             | 59.9%                                                                 |
| Predicted coding density                              | 84.7%                                                             | 87.3%                                                                 |
| number of subsystems                                  | 286                                                               | 284                                                                   |
| number of coding sequences                            | 2280                                                              | 2637                                                                  |
| number of RNAs                                        | 60                                                                | 91                                                                    |
| <b>Subsystem features</b>                             |                                                                   |                                                                       |
| Amino Acids and Derivatives                           | 201                                                               | 201                                                                   |
| Carbohydrates                                         | 146                                                               | 145                                                                   |
| Cell Division and Cell Cycle                          | 19                                                                | 19                                                                    |
| Cell Wall and Capsule                                 | 61                                                                | 56                                                                    |
| Cofactors, Vitamins, Prosthetic Groups,<br>Pigments   | 103                                                               | 104                                                                   |
| DNA Metabolism                                        | 63                                                                | 57                                                                    |
| Dormancy and Sporulation                              | 2                                                                 | 2                                                                     |
| Fatty Acids, Lipids, and Isoprenoids                  | 35                                                                | 33                                                                    |
| Iron acquisition and metabolism                       | 1                                                                 | 5                                                                     |
| Membrane Transport                                    | 35                                                                | 34                                                                    |
| Metabolism of Aromatic Compounds                      | 3                                                                 | 3                                                                     |
| Plant                                                 | 8                                                                 | 8                                                                     |
| Miscellaneous                                         | 4                                                                 | 4                                                                     |
| Motility and Chemotaxis                               | 2                                                                 | 0                                                                     |
| Nitrogen Metabolism                                   | 7                                                                 | 7                                                                     |
| Nucleosides and Nucleotides                           | 57                                                                | 56                                                                    |
| Phages, Prophages, Transposable<br>elements, Plasmids | 8                                                                 | 13                                                                    |
| Phosphorus Metabolism                                 | 27                                                                | 27                                                                    |
| Potassium metabolism                                  | 4                                                                 | 4                                                                     |
| Protein Metabolism                                    | 192                                                               | 201                                                                   |
| Regulation and Cell signaling                         | 16                                                                | 16                                                                    |
| Respiration                                           | 2                                                                 | 2                                                                     |
| RNA Metabolism                                        | 58                                                                | 58                                                                    |
| Secondary Metabolism                                  | 2                                                                 | 0                                                                     |
| Stress Response                                       | 31                                                                | 32                                                                    |
| Sulfur Metabolism                                     | 9                                                                 | 9                                                                     |
| Virulence, Disease and Defense                        | 32                                                                | 33                                                                    |

**Supplementary Table 1:** General genome feature comparison of *Bifidobacterium longum* subsp. *infantis* Bi-26 to *Bifidobacterium longum* subsp. *infantis* strain ATCC15697. Genomic assembly statistics along with subsystems (annotated from RAST) are displayed.

|                                                           | Gene name   | Enzyme       | Presence in <i>B. longum</i> subsp. <i>infantis</i> genomes |           |     |           |         |       |           |        |     |
|-----------------------------------------------------------|-------------|--------------|-------------------------------------------------------------|-----------|-----|-----------|---------|-------|-----------|--------|-----|
|                                                           |             |              | Bi-26                                                       | ATCC15697 | BT1 | Bifido_12 | TPY12-1 | IN-07 | Bifido_04 | IN-F29 | EK1 |
| <b>Leloir pathway genes</b>                               |             |              |                                                             |           |     |           |         |       |           |        |     |
| galactokinase                                             | <i>galK</i> | EC 2.7.7.6   | +                                                           | +         | +   | +         | +       | +     | +         | +      | +   |
| UDP-glucose 4-epimerase                                   | <i>galE</i> | EC 5.1.3.2   | +                                                           | +         | +   | +         | +       | +     | +         | +      | +   |
| galactose-1-phosphate uridylyltransferase                 | <i>galT</i> | EC 2.7.7.10  | +                                                           | +         | +   | +         | +       | +     | +         | +      | +   |
| phosphoglucomutase                                        | <i>pgm</i>  | EC 5.4.2.2   | +                                                           | +         | +   | +         | +       | +     | +         | +      | +   |
| <b>Main Fermentative pathway genes</b>                    |             |              |                                                             |           |     |           |         |       |           |        |     |
| glucokinase <i>glkA</i> Blon_0565                         | <i>glkA</i> | EC 2.7.1.63  | +                                                           | +         | +   | +         | +       | +     | +         | +      | +   |
| glucose-6-phosphate isomerase                             | <i>gpi</i>  | EC 5.3.1.9   | +                                                           | +         | +   | +         | +       | +     | +         | +      | +   |
| fructose-6-phosphate phosphoketolase                      | <i>xfp</i>  | EC 2.6.1.16  | +                                                           | +         | +   | +         | +       | +     | +         | +      | +   |
| transaldolase                                             | <i>tal</i>  | EC 2.2.1.2   | +                                                           | +         | +   | +         | +       | +     | +         | +      | +   |
| transketolase                                             | <i>tkt</i>  | EC 2.2.1.1   | +                                                           | +         | +   | +         | +       | +     | +         | +      | +   |
| ribose 5-phosphate isomerase                              | <i>rpiA</i> | EC 5.3.1.6   | +                                                           | +         | +   | +         | +       | +     | +         | +      | +   |
| Ribulose-phosphate 3-epimerase                            | <i>rpe</i>  | EC 5.1.3.1   | +                                                           | +         | +   | +         | +       | +     | +         | +      | +   |
| xylulose-5-phosphate phosphoketolase                      | <i>xfp</i>  | EC 4.1.2.9   | +                                                           | +         | +   | +         | +       | +     | +         | +      | +   |
| glyceraldehyde-3-phosphate dehydrogenase                  | <i>gap</i>  | EC 1.2.1.12  | +                                                           | +         | +   | +         | +       | +     | +         | +      | +   |
| phosphoglycerate kinase                                   | <i>pgk</i>  | EC 2.7.2.3   | +                                                           | +         | +   | +         | +       | +     | +         | +      | +   |
| phosphoglycerate mutase                                   | <i>pmg</i>  | EC 5.4.2.1   | +                                                           | +         | +   | +         | +       | +     | +         | +      | +   |
| enolase                                                   | <i>eno</i>  | EC 4.2.1.11  | +                                                           | +         | +   | +         | +       | +     | +         | +      | +   |
| pyruvate kinase                                           | <i>pyk</i>  | EC 2.7.1.40  | +                                                           | +         | +   | +         | +       | +     | +         | +      | +   |
| lactate dehydrogenase                                     | <i>ldh</i>  | EC 1.1.1.27  | +                                                           | +         | +   | +         | +       | +     | +         | +      | +   |
| <b>Fucose genes</b>                                       |             |              |                                                             |           |     |           |         |       |           |        |     |
| Alpha-L-fucosidase                                        | <i>fucA</i> | EC 3.2.1.51  | +                                                           | +         | +   | +         | +       | +     | +         | +      | +   |
| Fucose permease                                           | <i>fucP</i> | NA           | +                                                           | +         | +   | +         | +       | +     | +         | +      | +   |
| dehydrogenase clustered with L-fuconate utilization genes | NA          | EC 1.1.1.122 | +                                                           | +         | +   | +         | +       | +     | +         | +      | +   |
| L-fuconate dehydratase                                    |             | EC 4.2.1.68  | +                                                           | +         | +   | +         | +       | +     | +         | +      | +   |
| L-fucose mutarotase                                       | <i>fucU</i> | EC 5.1.3.29  | +                                                           | +         | +   | +         | +       | +     | +         | +      | +   |
| lactaldehyde reductase                                    | <i>fucO</i> | EC 1.1.1.77  | +                                                           | +         | +   | +         | +       | +     | +         | +      | +   |
| triose-phosphate isomerase                                | <i>tpiA</i> | EC 5.3.1.1   | +                                                           | +         | +   | +         | +       | +     | +         | +      | +   |
| <b>Acetate gene</b>                                       |             |              |                                                             |           |     |           |         |       |           |        |     |
| acetate kinase                                            | <i>ackA</i> | EC 2.7.2.1   | +                                                           | +         | +   | +         | +       | +     | +         | +      | +   |
| <b>Formate gene</b>                                       |             |              |                                                             |           |     |           |         |       |           |        |     |
| pyruvate formate-lyase                                    | <i>pfl</i>  | EC 2.3.1.54  | +                                                           | +         | +   | +         | +       | +     | +         | +      | +   |

**Supplementary Table 2:** Annotated genes related to 2'-FL utilization in Bi-26 and other *B. longum* subsp. *infantis* strains. Used in conjunction with Figure 1 to describe genes needed to make quantified metabolites. Included are gene name, KEGG enzyme class and pathway the gene is located in. Presence in other *B. longum* subsp. *infantis* strains is noted. Presence of genes was determined by searching for enzyme class number or annotations using Geneious. The strains selected were those that clustered with the type strain ATCC15697 in the National Center for Biotechnology Information (NCBI) *B. longum* dendrogram located at <https://www.ncbi.nlm.nih.gov/genome/183?> Accessed 04/21/2019.

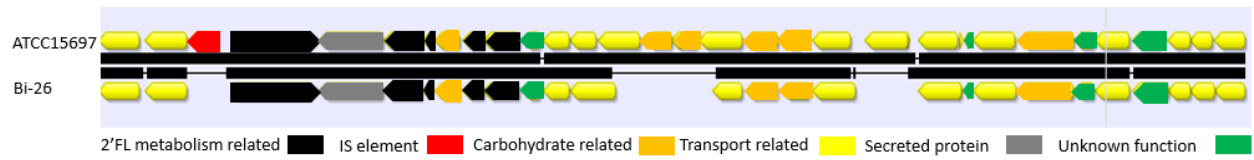

**Supplementary Figure 1:** Alignments of ATCC15697 and Bi-26 HMO cluster using Geneious. Genes are colored by their functionality. The middle black section of the figure shows the mismatches in translation. Gaps in Bi-26 for the IS element, transport proteins and secreted protein are where the genes are not present.

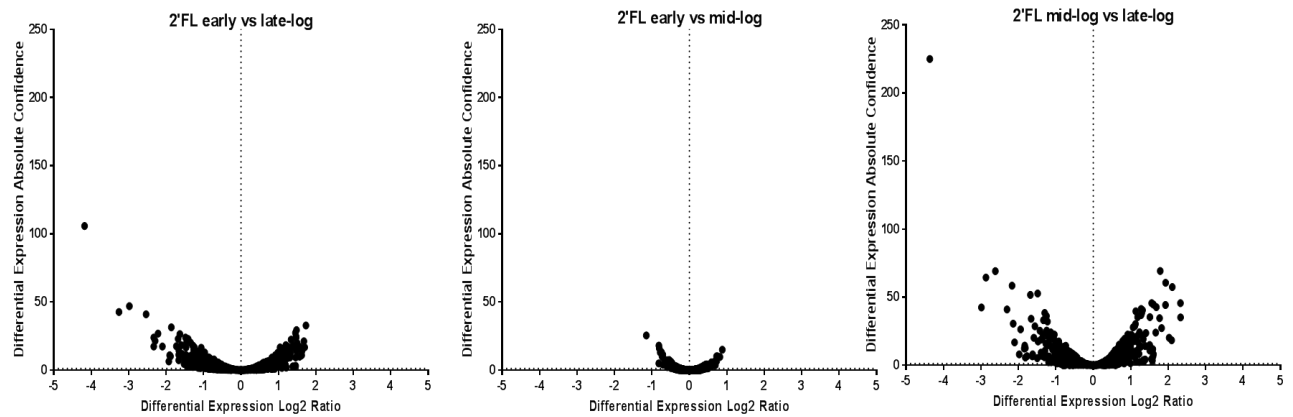

**Supplementary Figure 2:** Volcano plots of differential expression compared to absolute confidence for 2'-FL RNA-seq values compared to the other phases of growth on 2'-FL. Only values with a Log2 ratio above 1 and an absolute confidence above 1.30 (p-value 0.05) were considered significant.

A)

| Phase(s)       | Fucose related | Hypothetical | Transport related | Central metabolism | Other | Total |
|----------------|----------------|--------------|-------------------|--------------------|-------|-------|
| All 3          | 9              | 14           | 29                | 31                 | 12    | 95    |
| Early only     | 0              | 8            | 4                 | 13                 | 4     | 29    |
| Mid-log only   | 0              | 7            | 0                 | 0                  | 1     | 8     |
| Late-log only  | 0              | 15           | 7                 | 28                 | 5     | 55    |
| Early and mid  | 0              | 2            | 1                 | 3                  | 0     | 6     |
| Early and late | 0              | 16           | 4                 | 19                 | 8     | 47    |
| Mid and late   | 0              | 1            | 1                 | 2                  | 0     | 4     |

B)

| Comparison         | Early vs mid |         | Early vs late |      | Mid vs late |      |
|--------------------|--------------|---------|---------------|------|-------------|------|
|                    | Early        | Mid-log | Early         | Late | Mid-log     | Late |
| Fucose related     | 0            | 0       | 0             | 0    | 0           | 3    |
| Hypothetical       | 0            | 0       | 29            | 11   | 24          | 17   |
| Transport related  | 1            | 0       | 26            | 16   | 28          | 23   |
| Central Metabolism | 0            | 0       | 25            | 18   | 14          | 12   |
| Other              | 0            | 0       | 14            | 15   | 7           | 12   |
| Total              | 1            | 0       | 94            | 60   | 73          | 67   |

**Supplementary Table 3:** (A) Comparison of genes functions upregulated in 2'-FL fermentation and at what part of the fermentation they were upregulated in. (B) Comparing 2'-FL early vs mid and late and 2'-FL mid vs late for gene differences. To look at the differences in major systems throughout fermentation.

| Genes/ Functions                                                         | Log2 Ratio early | p-value early | Log2 Ratio mid | p-value mid | Log2 Ratio late | p-value late |
|--------------------------------------------------------------------------|------------------|---------------|----------------|-------------|-----------------|--------------|
| <b>Lactose Gene</b>                                                      |                  |               |                |             |                 |              |
| Beta-galactosidase (EC 3.2.1.23) CDS HMO cluster                         | 1.76363239       | 2.23E-42      | 1.453036987    | 1.11E-05    | 1.521517602     | 2.05E-14     |
| <b>Leloir pathway genes</b>                                              |                  |               |                |             |                 |              |
| Galactokinase (EC 2.7.1.6) CDS                                           | 0.126435896      | 0.288887344   | 0.750285825    | 0.062522351 | 0.544604571     | 3.85E-05     |
| UDP-glucose 4-epimerase (EC 5.1.3.2) CDS                                 | 0.810049707      | 1.89E-10      | 0.45840775     | 0.145733665 | 0.372488235     | 0.005699352  |
| Galactose-1-phosphate uridylyltransferase (EC 2.7.7.10) CDS              | 1.099644411      | 8.78E-21      | 0.823699827    | 0.030696562 | 0.687430616     | 4.70E-08     |
| Phosphoglucomutase (EC 5.4.2.2) CDS                                      | -0.576976916     | 9.06E-06      | 0.181997756    | 0.567249427 | 0.11699882      | 0.3739832    |
| <b>Main fermentation genes</b>                                           |                  |               |                |             |                 |              |
| Polyphosphate glucokinase (EC 2.7.1.63) CDS                              | 0.655557986      | 5.34E-08      | 0.762651769    | 0.047869446 | 0.860681059     | 2.22924E-09  |
| Glucose-6-phosphate isomerase (EC 5.3.1.9) CDS                           | 0.901957471      | 6.90E-13      | 0.933528033    | 0.041092786 | 0.385425846     | 0.008517778  |
| Fructose-6-phosphate phosphoketolase (EC 4.1.2.22) CDS                   | 0.391267047      | 0.001118049   | 0.670967696    | 0.114195627 | 0.30370557      | 0.017148752  |
| Transaldolase (EC 2.2.1.2) CDS                                           | 0.554885296      | 2.25E-06      | 0.756569661    | 0.08854475  | -0.023665187    | 0.850368066  |
| Transketolase (EC 2.2.1.1) CDS                                           | 0.191512513      | 0.14128884    | 0.488204592    | 0.182984772 | 0.220792855     | 0.102939386  |
| Ribose 5-phosphate isomerase A (EC 5.3.1.6) CDS                          | 0.383782011      | 0.006770406   | 0.861195531    | 0.050840225 | 0.572597746     | 7.65931E-05  |
| Ribulose-phosphate 3-epimerase (EC 5.1.3.1) CDS                          | 0.413140195      | 0.001308143   | 0.205487583    | 0.555270292 | 0.113840979     | 0.37594078   |
| NAD-dependent glyceraldehyde-3-phosphate dehydrogenase (EC 1.2.1.12) CDS | 0.365239397      | 0.003791971   | 0.577401413    | 0.116716001 | 0.122090122     | 0.308817639  |
| Phosphoglycerate kinase (EC 2.7.2.3) CDS                                 | 0.47453399       | 4.62E-05      | 0.594644044    | 0.089754822 | 0.444910069     | 0.001448169  |
| Phosphoglycerate mutase (EC 5.4.2.1) CDS                                 | 0.287742191      | 0.034010109   | 0.319510881    | 0.33732752  | 0.140411506     | 0.307780837  |
| Enolase (EC 4.2.1.11) CDS                                                | 0.412183735      | 0.000482006   | 0.67203813     | 0.112037536 | 0.072738769     | 0.58552877   |
| Pyruvate kinase (EC 2.7.1.40) CDS                                        | 0.155276824      | 0.194011771   | 0.1794255      | 0.575430108 | -0.03776668     | 0.796051926  |
| L-lactate dehydrogenase (EC 1.1.1.27) CDS                                | 0.651064527      | 7.94E-07      | 0.596209199    | 0.130691092 | -0.102965481    | 0.468593789  |
| <b>Fucose genes</b>                                                      |                  |               |                |             |                 |              |
| Alpha-L-fucosidase (EC 3.2.1.51) CDS Non hmo cluster                     | 3.687712028      | 6.66E-27      | 2.157112872    | 8.01E-07    | 4.281550579     | 9.41698E-29  |
| Alpha-L-fucosidase (EC 3.2.1.51) CDS HMO cluster                         | 1.32547242       | 2.89E-24      | 1.453024153    | 0.001622438 | 1.572076226     | 7.27592E-27  |
| dehydrogenase clustered with L-fuconate utilization genes CDS            | 8.708998093      | 0             | 3.625277007    | 1.1182E-12  | 9.163268073     | 0            |
| dehydrogenase clustered with L-fuconate utilization genes CDS            | 1.505194366      | 1.34E-33      | 1.67300627     | 0.000363805 | 2.013244319     | 4.81E-47     |
| L-fuconate dehydratase (EC 4.2.1.68) CDS                                 | 7.118010773      | 0             | 4.00346757     | 2.14E-28    | 7.302836379     | 0            |
| L-fuconate dehydratase (EC 4.2.1.68) CDS HMO cluster                     | 6.113032129      | 2.20E-283     | 1.692842419    | 0.000300618 | 2.048002117     | 1.36E-48     |
| L-fucose mutarotase CDS                                                  | 6.113032129      | 2.20E-283     | 3.541064248    | 6.06E-27    | 6.546959726     | 5.27E-136    |
| L-fucose mutarotase CDS HMO cluster                                      | 1.436944157      | 3.46E-22      | 1.597622702    | 0.000962691 | 1.701493459     | 1.47E-21     |
| Lactaldehyde reductase (EC 1.1.1.77) CDS                                 | 1.439913964      | 2.10E-27      | 1.849089764    | 1.28E-08    | 2.530493203     | 4.72E-40     |
| Triosephosphate isomerase (EC 5.3.1.1) CDS                               | 0.603615877      | 3.19E-06      | 0.523593576    | 0.108366676 | 0.748135852     | 4.60E-09     |
| <b>Acetate gene</b>                                                      |                  |               |                |             |                 |              |
| Acetate kinase (EC 2.7.2.1) CDS                                          | 0.393547168      | 0.000835347   | 0.731456777    | 0.101646728 | 0.29486821      | 0.026206859  |
| <b>Formate gene</b>                                                      |                  |               |                |             |                 |              |
| Pyruvate formate-lyase (EC 2.3.1.54) CDS                                 | 1.492721613      | 3.09E-35      | 1.127364895    | 0.000408604 | 1.423781291     | 4.23E-19     |

**Supplementary Table 4:** RNA-seq results of genes of interest in 2'-FL metabolism. Genes from Supplementary Table 2 log2 expression and p-value results from the early, mid-log and late phases are shown. Results are significant with a log2 of greater than 1 for 2'-FL samples and less than -1 for the lactose control samples with a p-value of less than 0.05. Green results are showing higher expression in 2'-FL samples while orange, yellow and red show higher expression in lactose samples or no change in expression.

| Metabolite | Carb Source (mM) |         | Lactic acid (mM) |         | Acetate (mM) |         | Formate (mM) |         | Pyruvate (mM) |         | 1,2-PD (mM) |         | Fucose (mM) |         |
|------------|------------------|---------|------------------|---------|--------------|---------|--------------|---------|---------------|---------|-------------|---------|-------------|---------|
|            | 2'FL             | Lactose | 2'FL             | Lactose | 2'FL         | Lactose | 2'FL         | Lactose | 2'FL          | Lactose | 2'FL        | Lactose | 2'FL        | Lactose |
| Phase      | 2'FL             | Lactose | 2'FL             | Lactose | 2'FL         | Lactose | 2'FL         | Lactose | 2'FL          | Lactose | 2'FL        | Lactose | 2'FL        | Lactose |
| Initial    | 15.40            | 12.33   | 2.06             | 1.97    | 0.67         | 0.63    | 0.16         | 0.17    | ND            | ND      | 0.15        | ND      | 0.49        | ND      |
| Early      | 14.23            | 8.43    | 2.59             | 2.49    | 3.58         | 1.61    | 1.01         | 0.27    | ND            | ND      | 0.48        | ND      | 0.72        | ND      |
| Mid-log    | 12.65            | 7.27    | 4.48             | 3.59    | 8.43         | 2.81    | 1.73         | 0.39    | ND            | ND      | 1.27        | ND      | 0.92        | ND      |
| Late-log   | 4.03             | ND      | 26.57            | 37.17   | 45.39        | 54.06   | 2.61         | ND      | 4.23          | ND      | 9.94        | ND      | 1.34        | ND      |

  

| Rate of production |                  |         |                  |         |              |         |              |         |               |         |             |         |             |         |
|--------------------|------------------|---------|------------------|---------|--------------|---------|--------------|---------|---------------|---------|-------------|---------|-------------|---------|
| Metabolite         | Carb Source (mM) |         | Lactic acid (mM) |         | Acetate (mM) |         | Formate (mM) |         | Pyruvate (mM) |         | 1,2-PD (mM) |         | Fucose (mM) |         |
|                    | 2'FL             | Lactose | 2'FL             | Lactose | 2'FL         | Lactose | 2'FL         | Lactose | 2'FL          | Lactose | 2'FL        | Lactose | 2'FL        | Lactose |
| Phase              | 2'FL             | Lactose | 2'FL             | Lactose | 2'FL         | Lactose | 2'FL         | Lactose | 2'FL          | Lactose | 2'FL        | Lactose | 2'FL        | Lactose |
| I→E                | -0.17*           | -0.56   | 0.08             | 0.07    | 0.42*        | 0.14    | 0.12*        | 0.01    | NA            | NA      | 0.05*       | NA      | 0.03*       | NA      |
| E→M                | -0.79*           | -0.58   | 0.95*            | 0.55    | 2.43*        | 0.60    | 0.36*        | 0.06    | NA            | NA      | 0.40*       | NA      | 0.10*       | NA      |
| M→L                | -0.57*           | NA      | 1.47*            | 2.24    | 2.46         | 3.42    | 0.06*        | NA      | NA            | NA      | 0.58*       | NA      | 0.03*       | NA      |

  

| Rate of production per mM of carbon source |                    |         |                  |         |              |         |              |         |               |         |             |         |             |         |
|--------------------------------------------|--------------------|---------|------------------|---------|--------------|---------|--------------|---------|---------------|---------|-------------|---------|-------------|---------|
| Metabolite                                 | Carb consumed (mM) |         | Lactic acid (mM) |         | Acetate (mM) |         | Formate (mM) |         | Pyruvate (mM) |         | 1,2-PD (mM) |         | Fucose (mM) |         |
|                                            | 2'FL               | Lactose | 2'FL             | Lactose | 2'FL         | Lactose | 2'FL         | Lactose | 2'FL          | Lactose | 2'FL        | Lactose | 2'FL        | Lactose |
| Phase                                      | 2'FL               | Lactose | 2'FL             | Lactose | 2'FL         | Lactose | 2'FL         | Lactose | 2'FL          | Lactose | 2'FL        | Lactose | 2'FL        | Lactose |
| I→E                                        | 1.17*              | 3.9     | 0.45*            | 0.13    | 2.49*        | 0.25    | 0.73*        | 0.03    | NA            | NA      | 0.28*       | NA      | 0.20*       | NA      |
| E→M                                        | 1.58               | 1.16    | 1.20             | 0.95    | 3.07*        | 1.03    | 0.46*        | 0.10    | NA            | NA      | 0.50*       | NA      | 0.13*       | NA      |
| M→L                                        | 8.62               | 7.29    | 2.56*            | 4.61    | 4.29*        | 7.03    | 0.10*        | NA      | 0.49*         | NA      | 1.01*       | NA      | 0.05*       | NA      |

\*Significant difference compared to control

**Supplementary Table 5:** Overall metabolite results of each of the tested metabolites along with the carbon source are listed in the top table in mM values. The tables below contain the rates of production or consumption of each of the tested compounds. The middle table is valued with production over time while the lower table is valued at production per mM of carbon source consumed. Phases are labeled I=initial, E=early, M=mid-log, and L=late-log phases for the last two tables.

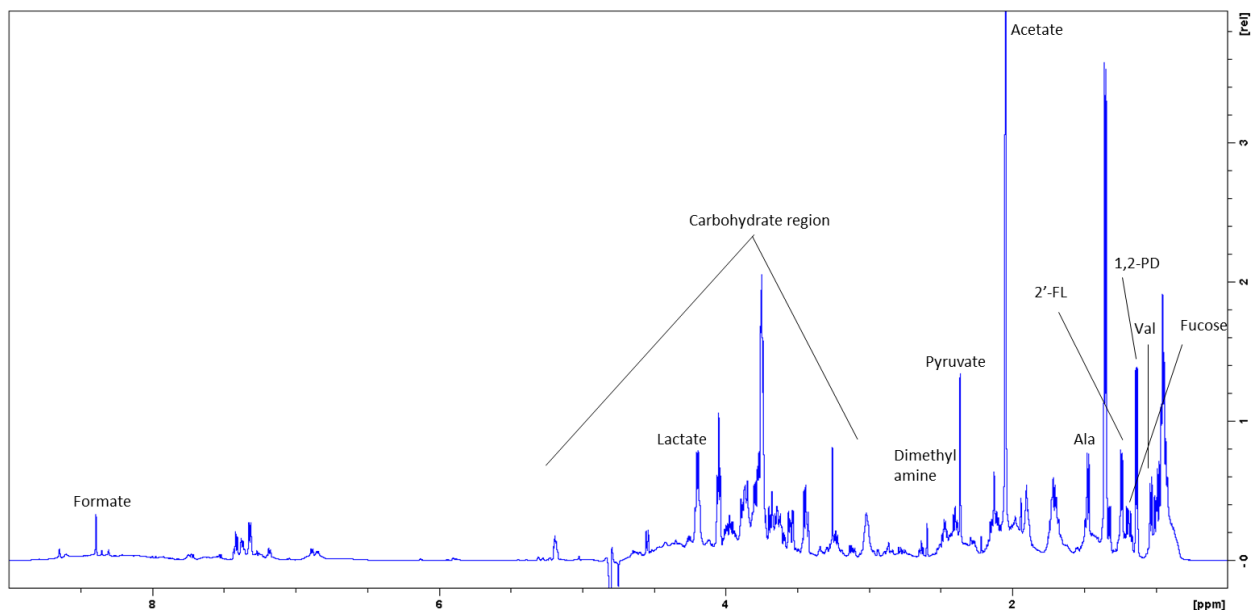

**Supplementary Figure 3:** Representative  $^1\text{H}$  NMR spectra of a 24h 2'-FL fermentation sample. Selected quantified metabolites present at 24h 2'-FL fermentation have been labeled.
